# Supplementary material
Source: PubMed Central journal article supplement (PMC1747065)

## Appendix 2: CAP score calculation scheme

| Item*                                  | Quantification                 | CAP                         | Respiratory | Well being |
|----------------------------------------|--------------------------------|-----------------------------|-------------|------------|
| <b>Shortness of breath</b>             |                                |                             |             |            |
| walking the stairs                     | <input type="checkbox"/> yes 1 |                             |             |            |
| taking a shower                        | <input type="checkbox"/> yes 1 |                             |             |            |
| walking in the street                  | <input type="checkbox"/> yes 1 |                             |             |            |
| washing/dressing                       | <input type="checkbox"/> yes 1 |                             |             |            |
| walking around the house/ward          | <input type="checkbox"/> yes 1 |                             |             |            |
| sitting still                          | <input type="checkbox"/> yes 1 |                             |             |            |
|                                        | 0                              | <input type="checkbox"/> 6  |             |            |
| <b>subtotal (sum)</b>                  | 1                              | <input type="checkbox"/> -2 | → _____     | → _____    |
|                                        | 2-3                            | <input type="checkbox"/> -6 |             |            |
|                                        | 4-6                            | <input type="checkbox"/> -8 |             |            |
| <b>Severity of shortness of breath</b> |                                |                             |             |            |
| not at all short of breath (1)         | <input type="checkbox"/> 7     |                             |             |            |
| slightly short of breath (2)           | <input type="checkbox"/> -2    |                             |             |            |
| fairly short of breath (3)             | <input type="checkbox"/> -8    | → _____                     | → _____     |            |
| substantially short of breath (4)      | <input type="checkbox"/> -11   |                             |             |            |
| terribly short of breath (5)           | <input type="checkbox"/> -13   |                             |             |            |
| <b>Cough</b>                           |                                |                             |             |            |
| No                                     | <input type="checkbox"/> 9     |                             |             |            |
| only in the morning, when getting up   | <input type="checkbox"/> -6    |                             |             |            |
| now and then, all through the day      | <input type="checkbox"/> -6    | → _____                     | → _____     |            |
| frequently, all through the day        | <input type="checkbox"/> -12   |                             |             |            |
| <b>Cough up sputum</b>                 |                                |                             |             |            |
| None                                   | <input type="checkbox"/> 7     |                             |             |            |
| less than 2 spoons                     | <input type="checkbox"/> -8    |                             |             |            |
| more than 2 spoons                     | <input type="checkbox"/> -13   | → _____                     | → _____     |            |
| half a cup or more                     | <input type="checkbox"/> -16   |                             |             |            |
| <b>Cough up sputum with ease</b>       |                                |                             |             |            |
| no sputum                              | <input type="checkbox"/> 7     |                             |             |            |
| with ease                              | <input type="checkbox"/> -9    |                             |             |            |
| fairly difficult                       | <input type="checkbox"/> -10   | → _____                     | → _____     |            |
| very difficult                         | <input type="checkbox"/> -10   |                             |             |            |
| <b>Colour of sputum</b>                |                                |                             |             |            |
| did not pay attention/no sputum        | <input type="checkbox"/> 8     |                             |             |            |
| transparent                            | <input type="checkbox"/> -8    |                             |             |            |
| white                                  | <input type="checkbox"/> -8    | → _____                     | → _____     |            |
| green, yellow or brown                 | <input type="checkbox"/> -14   |                             |             |            |
| <b>Feeling fit</b>                     |                                |                             |             |            |
| yes, that is correct                   | <input type="checkbox"/> 12    |                             |             |            |
|                                        | <input type="checkbox"/> 4     |                             |             |            |
|                                        | <input type="checkbox"/> 0     | → _____                     |             | → _____    |
|                                        | <input type="checkbox"/> -6    |                             |             |            |
| no, that is not correct                | <input type="checkbox"/> -11   |                             |             |            |
| <b>General state of health</b>         |                                |                             |             |            |
| excellent (1)                          | <input type="checkbox"/> 14    |                             |             |            |
| good (2)                               | <input type="checkbox"/> 8     |                             |             |            |
| moderate (3)                           | <input type="checkbox"/> -1    | → _____                     |             | → _____    |
| poor (4)                               | <input type="checkbox"/> -9    |                             |             |            |
| very poor (5)                          | <input type="checkbox"/> -15   |                             |             |            |
| <b>Raw total</b>                       | <b>(sum)</b>                   | _____ (A)                   | _____ (B)   | _____ (C)  |

### SCALE TRANSFORMATION

|                          |                   |       |
|--------------------------|-------------------|-------|
| <b>CAP SCORE</b>         | = (A + 99) / 1.69 | _____ |
| <b>RESPIRATORY SCORE</b> | = (B + 73) / 1.17 | _____ |
| <b>WELL BEING CORE</b>   | = (C + 26) / 0.52 | _____ |

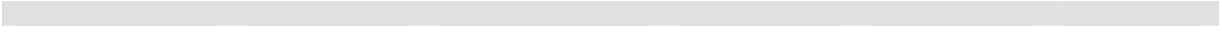

Supplement: thorax_59_7_591__2.pdf [file thorax_59_7_591__2.pdf]
