# Supplementary material
Source: PubMed Central journal article supplement (PMC1747065)
Supplement: thorax_59_7_591__1.pdf [file thorax_59_7_591__1.pdf]

## Appendix 1: CAP score questionnaire\*

| Question                                                                                                                                                                 | level                                | coding                                                                                                                                               |
|--------------------------------------------------------------------------------------------------------------------------------------------------------------------------|--------------------------------------|------------------------------------------------------------------------------------------------------------------------------------------------------|
| <b>1. Are you today (XXth day of the evaluation) bothered by shortness of breath when</b>                                                                                |                                      |                                                                                                                                                      |
|                                                                                                                                                                          | sitting still                        | <input type="checkbox"/> yes <input type="checkbox"/> no                                                                                             |
|                                                                                                                                                                          | walking around the house/ward        | <input type="checkbox"/> yes <input type="checkbox"/> no                                                                                             |
|                                                                                                                                                                          | washing/dressing                     | <input type="checkbox"/> yes <input type="checkbox"/> no                                                                                             |
|                                                                                                                                                                          | walking in the street                | <input type="checkbox"/> yes <input type="checkbox"/> no                                                                                             |
|                                                                                                                                                                          | taking a shower                      | <input type="checkbox"/> yes <input type="checkbox"/> no                                                                                             |
|                                                                                                                                                                          | walking the stairs                   | <input type="checkbox"/> yes <input type="checkbox"/> no                                                                                             |
| <b>2. If you were to give a mark on a 1 to 5 scale expressing the severity of your shortness of breath at the moment, which mark would that be?</b>                      |                                      |                                                                                                                                                      |
|                                                                                                                                                                          | not at all short of breath (1)       | <input type="checkbox"/>                                                                                                                             |
|                                                                                                                                                                          | slightly short of breath (2)         | <input type="checkbox"/>                                                                                                                             |
|                                                                                                                                                                          | fairly short of breath (3)           | <input type="checkbox"/>                                                                                                                             |
|                                                                                                                                                                          | substantially short of breath (4)    | <input type="checkbox"/>                                                                                                                             |
|                                                                                                                                                                          | terribly short of breath (5)         | <input type="checkbox"/>                                                                                                                             |
| <b>3a. Do you cough?</b>                                                                                                                                                 |                                      |                                                                                                                                                      |
|                                                                                                                                                                          | no (skip questions 3b, c and d)      | <input type="checkbox"/>                                                                                                                             |
|                                                                                                                                                                          | only in the morning, when getting up | <input type="checkbox"/>                                                                                                                             |
|                                                                                                                                                                          | now and then, all through the day    | <input type="checkbox"/>                                                                                                                             |
|                                                                                                                                                                          | frequently, all through the day      | <input type="checkbox"/>                                                                                                                             |
| <b>3b. Do you cough up sputum? (amount of sputum by 24 hrs)</b>                                                                                                          |                                      |                                                                                                                                                      |
|                                                                                                                                                                          | no                                   | <input type="checkbox"/>                                                                                                                             |
|                                                                                                                                                                          | less than 2 spoons                   | <input type="checkbox"/>                                                                                                                             |
|                                                                                                                                                                          | more than 2 spoons                   | <input type="checkbox"/>                                                                                                                             |
|                                                                                                                                                                          | half a cup or more                   | <input type="checkbox"/>                                                                                                                             |
| <b>3c. Do you cough up the sputum with ease?</b>                                                                                                                         |                                      |                                                                                                                                                      |
|                                                                                                                                                                          | not bothered by sputum               | <input type="checkbox"/>                                                                                                                             |
|                                                                                                                                                                          | with ease                            | <input type="checkbox"/>                                                                                                                             |
|                                                                                                                                                                          | fairly difficult                     | <input type="checkbox"/>                                                                                                                             |
|                                                                                                                                                                          | very difficult                       | <input type="checkbox"/>                                                                                                                             |
| <b>3d. What is the color of the sputum?</b>                                                                                                                              |                                      |                                                                                                                                                      |
|                                                                                                                                                                          | did not pay attention/no sputum      | <input type="checkbox"/>                                                                                                                             |
|                                                                                                                                                                          | transparent                          | <input type="checkbox"/>                                                                                                                             |
|                                                                                                                                                                          | white                                | <input type="checkbox"/>                                                                                                                             |
|                                                                                                                                                                          | green, yellow or brown               | <input type="checkbox"/>                                                                                                                             |
| <b>4. When the following statement is correct, please check the leftmost box, the less you agree with the statement, one of the boxes on the right can be ticked off</b> |                                      |                                                                                                                                                      |
| I feel fit                                                                                                                                                               | yes, that is correct                 | <input type="checkbox"/> <input type="checkbox"/> <input type="checkbox"/> <input type="checkbox"/> <input type="checkbox"/> no, that is not correct |
| <b>5. If you were to give a mark on a 1 to 5 scale expressing your general state of health at the moment, which mark would that be?</b>                                  |                                      |                                                                                                                                                      |
|                                                                                                                                                                          | excellent (1)                        | <input type="checkbox"/>                                                                                                                             |
|                                                                                                                                                                          | good (2)                             | <input type="checkbox"/>                                                                                                                             |
|                                                                                                                                                                          | fair (3)                             | <input type="checkbox"/>                                                                                                                             |
|                                                                                                                                                                          | poor (4)                             | <input type="checkbox"/>                                                                                                                             |
|                                                                                                                                                                          | very poor (5)                        | <input type="checkbox"/>                                                                                                                             |

\*Translated from Dutch.
